# Supplementary material for: Qualitative tissue differentiation by analysing the intensity ratios of atomic emission lines using laser induced breakdown spectroscopy (LIBS): prospects for a feedback mechanism for surgical laser systems
Source: PubMed Central journal article supplement — J Biophotonics. 2013 Dec 23;8(1-2):153–61. doi: 10.1002/jbio.201300159 (PMC4320783; doi:10.1002/jbio.201300159), 2013-12-23
Supplement: jbio0008-0153-sd1.pdf [file jbio0008-0153-sd1.pdf]

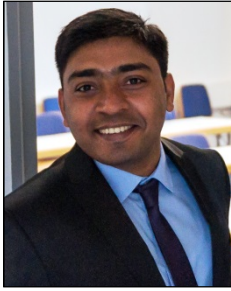

**Rajesh Kanawade** is a research staff at the Clinical Photonics Lab (SAOT) Erlangen in Germany. Rajesh is working on the development of optical spectroscopic techniques for non-invasive clinical applications. Rajesh Kanawade is a president of SPIE FAU chapter.

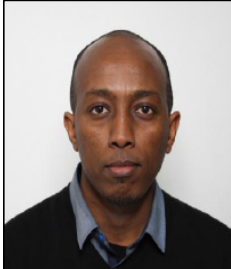

**Fanuel Mahari** is a research student at the Institute of Photonic Technologies – LPT, at the University of Erlangen-Nuremberg, Germany. Fanuel is working in the development of sensor based tissue specific laser surgery using LIBS.

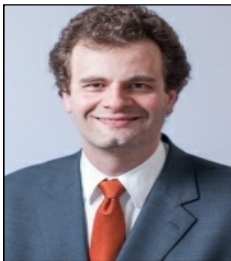

**Florian Klämpfl** is a member of the research staff at the Institute of Photonic Technologies of the University of Erlangen-Nuremberg. He works in the group Sensing, Control, and Real-time Systems.

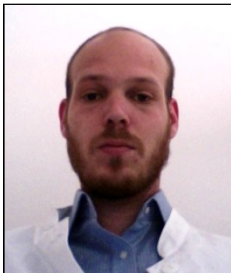

**Max Rohde** is a fully trained dentist with focus on oral surgery. He works as a research assistant at the University Hospital Erlangen at the Department for Oral- and Maxillofacial Surgery. His field of research focuses on optical tissue identification in the head and neck region.

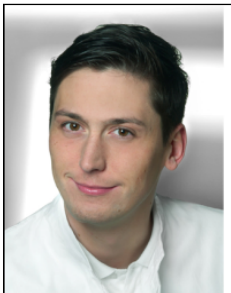

**Christian Knipfer** is a fully trained graduate of the dental school and works as a research assistant at the University Hospital Erlangen at the Department for Oral- and Maxillofacial Surgery, Germany. His field of research focuses on optical diagnostics of pathologies in the head and neck area and laser surgery.

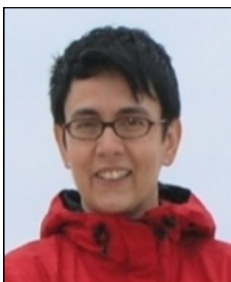

**Katja Tangermann-Gerk** is a research staff member at the Bavarian Laser Center. She is working in the field of laser surgery, optical diagnostics and sensor-based process control. Katja Tangermann-Gerk is a mentor at SAOT.

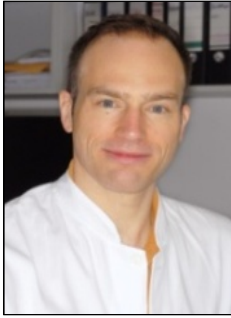

**Florian Stelzle** is a fully trained surgeon, specialized in oral and maxillo-facial surgery, at the University Hospital Erlangen, Germany. His research focuses is on optical diagnostics and laser surgery. He is medical safety manager at SAOT.

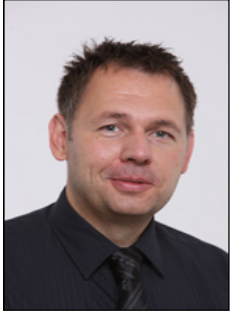

**Michael Schmidt** is a head of Institute of Photonic Technologies at the University of Erlangen-Nuremberg. He is also a co-coordinator of SAOT. His fields of research are additive manufacturing, medical photonics, ultrafast laser technologies, sensing, control, real-time systems, simulation and modeling.
